# Supplementary material for: Robust Activity of Avapritinib, Potent and Highly Selective Inhibitor of Mutated KIT, in Patient-derived Xenograft Models of Gastrointestinal Stromal Tumors
Source: Oxford University Press journal article supplement (doi:10.1158/1078-0432.ccr-18-1858), 2018-10-01
Supplement: 10780432ccr181858-sup-203463_2_supp_5025744_p8xtk8.pdf [file 10780432ccr181858-sup-203463_2_supp_5025744_p8xtk8.pdf]

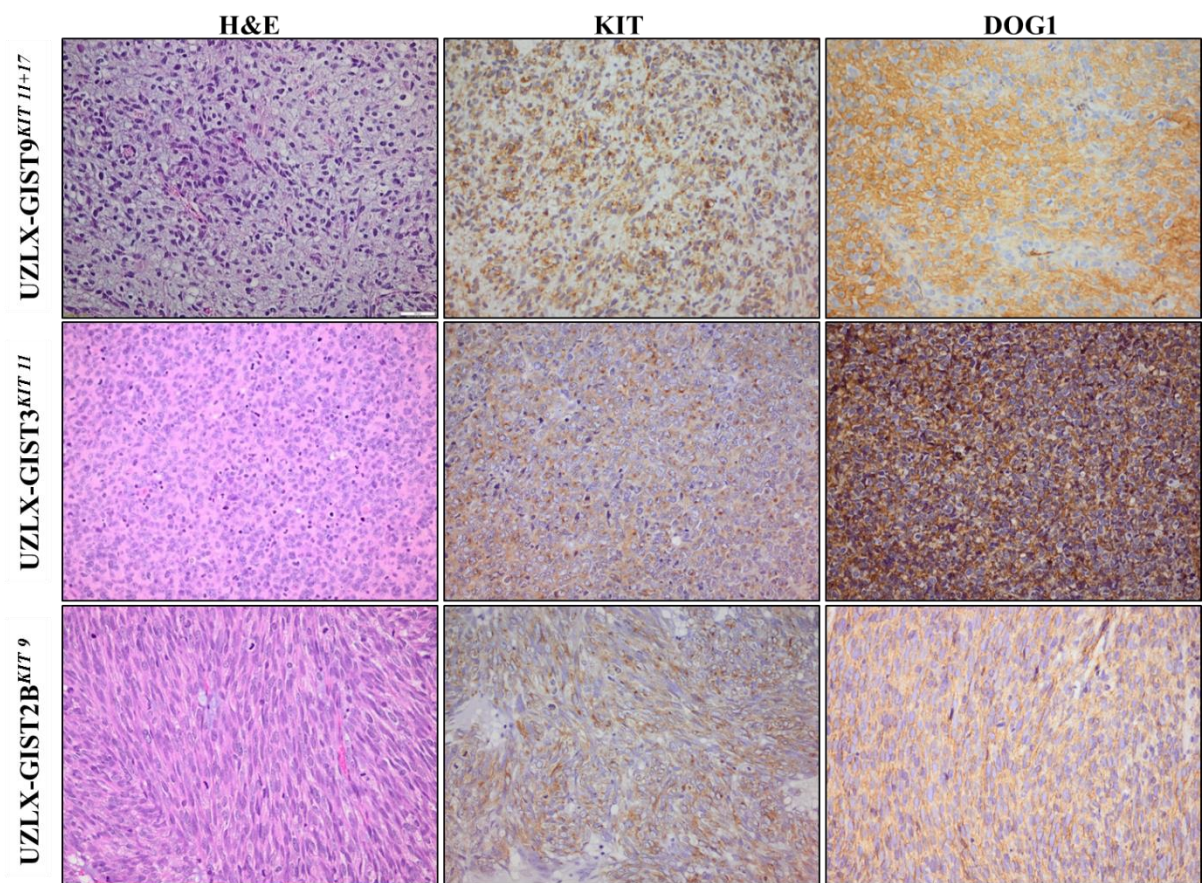

**Supplemental Figure S3.** Representative images of H&E, KIT and DOG1 staining (200x magnification) from vehicle-treated tumors from three xenografts, characterizing models used in the experiment.
